# Supplementary material for: Synthesis, characterization and properties of indium-doped manganese oxide molecular sieve sponges
Source: Royal Society of Chemistry journal article supplement (doi:10.1039/d4nj00777h), 2024-01-01
Supplement: d4nj00777h1.pdf [file d4nj00777h1.pdf]

## Supporting Information

### **Synthesis, characterization and properties of indium-doped manganese oxide molecular sieve sponges**

Zhenxin Liu <sup>1</sup>, Xidong Wang <sup>2</sup>, Xuehui Guo <sup>1</sup>, Depeng Wu <sup>1</sup>, Yu Xing <sup>1,\*</sup>

<sup>1</sup> Henan Provincial Key Laboratory of Surface and Interface Science, School of Materials and Chemical

Engineering, Zhengzhou University of Light Industry, Zhengzhou, 450002, China.

<sup>2</sup> School of Electric and Information, Northeast Agricultural University, Harbin, 150030, China.

\* To whom correspondence should be addressed. E-mail address: yuxing@zzuli.edu.cn (Y. Xing). Tel/Fax:

+86 371 86608700.

Supporting Information Table S1. Comparison and highlight the advantages of this work.

|            | Sample code                                                                                                                 | Macroscopic morphology | Electrical resistivity /( $\text{k}\Omega \cdot \text{cm}$ ) | Electrical conductivity /( $\text{mS} \cdot \text{cm}^{-1}$ ) | ICP concentration of indium (wt) |
|------------|-----------------------------------------------------------------------------------------------------------------------------|------------------------|--------------------------------------------------------------|---------------------------------------------------------------|----------------------------------|
| Comparison | M1-powder                                                                                                                   | powder                 | 0.23                                                         | 4.34                                                          | 9.14%                            |
|            | M2-powder                                                                                                                   | powder                 | 0.10                                                         | 10.06                                                         | 3.03%                            |
|            | M3-powder                                                                                                                   | powder                 | 0.05                                                         | 19.23                                                         | 5.15%                            |
|            | M4-powder                                                                                                                   | powder                 | 0.03                                                         | 32.26                                                         | 4.48%                            |
|            | R-powder                                                                                                                    | powder                 | 0.72                                                         | 1.39                                                          | 0.00%                            |
|            | M2-sponge                                                                                                                   | 3D foam                | 0.19                                                         | 5.19                                                          | 3.03%                            |
|            | M3-sponge                                                                                                                   | 3D foam                | 0.74                                                         | 1.35                                                          | 5.15%                            |
|            | R-sponge                                                                                                                    | 3D foam                | 0.21                                                         | 4.72                                                          | 0.00%                            |
| Highlight  | Free-standing, macroscopic 3D manganese oxide molecular sieve sponges were prepared.                                        |                        |                                                              |                                                               |                                  |
|            | Electrical conductivity of substrates increases by 3-23 times upon indium doping conditions.                                |                        |                                                              |                                                               |                                  |
|            | Indium doping may create two new FT-IR bands at $1090\text{-}1092 \text{ cm}^{-1}$ and $1026\text{-}1028 \text{ cm}^{-1}$ . |                        |                                                              |                                                               |                                  |
|            | Indium doping may weaken most Raman bands except the band at ca. $640 \text{ cm}^{-1}$ .                                    |                        |                                                              |                                                               |                                  |
|            | Indium-doped OMS-2 material is electroactive for the catalytic reduction of oxygen.                                         |                        |                                                              |                                                               |                                  |
